# Supplementary material for: Association of serum zinc with mineral stress in chronic kidney disease
Source: PubMed Central journal article supplement (PMC11403325; doi:10.1093/ckj/sfae258), 2024-08-20
Supplement: sfae258_supplemental_file.pdf [file sfae258_supplemental_file.pdf]

## **Supplementary material**

**Association of serum zinc with mineral stress in chronic kidney disease**

**Suppl. Figure 1.** Correlations of fractional excretion zinc (FE zinc, %) with (A, n=233) serum calcification propensity (T50) and (B, n=232) hydrodynamic radius of calciprotein particles (CPP2) in blood donors and CKD patients. P values are indicated in the figure.

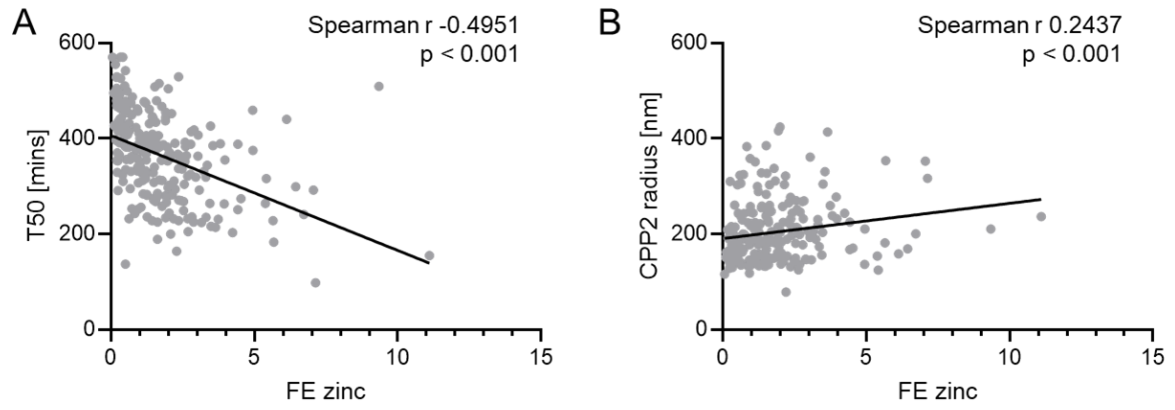

**Suppl. Figure 2.** Correlations of fractional excretion zinc (FE zinc, %) with pulse pressure (**A**; n= 210), as well as pulse wave velocity (PWV, **B**; n=202), total arterial compliance index TACI (**C**; n=195) and aortic augmentation index at heart rate 75 (AIX, **D**; n=142) in blood donors and CKD patients. P values are indicated in the figure.

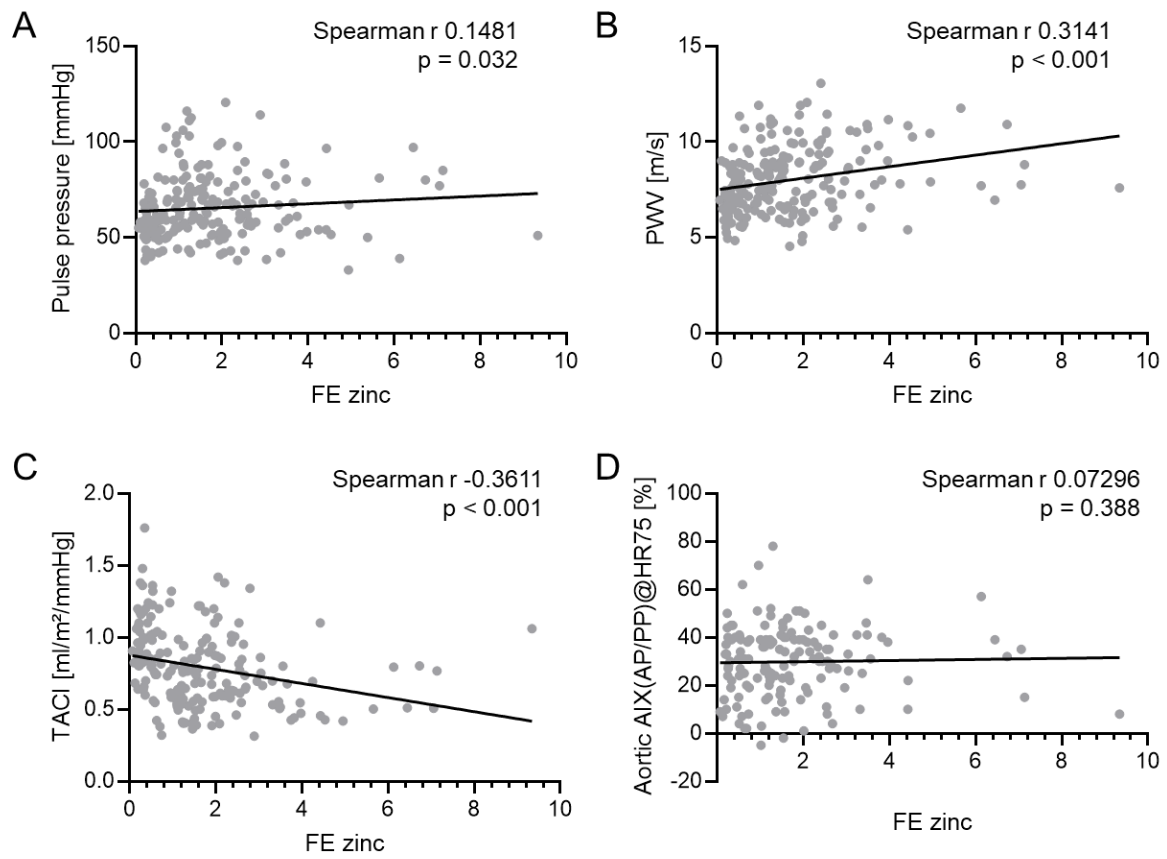

**Suppl. Table 1.** Factors associated with serum calcification propensity (T50, n=232) and hydrodynamic radius of CPP2 (n=231) in blood donors and patients with renal disease in a hierarchical regression model (dependent variable T50 or CPP2 radius, model 1 includes age, sex, calcium, phosphate, magnesium and albumin, model 2 further includes fractional excretion of zinc), shown with regression coefficients (beta) and levels of significance (p value; bolded if  $p < 0.05$ ).

| T50 (mins)       | Model 1       |             | Model 2       |             |
|------------------|---------------|-------------|---------------|-------------|
|                  | beta          | p           | beta          | p           |
| Age (yrs)        | <b>-0.097</b> | <b>.032</b> | <b>-0.091</b> | <b>.045</b> |
| Sex (m1/f0)      | 0.025         | .563        | 0.039         | .383        |
| Calcium (mmol)   | <b>0.134</b>  | <b>.010</b> | <b>0.145</b>  | <b>.006</b> |
| Phosphate (mmol) | <b>-0.587</b> | <b>.000</b> | <b>-0.545</b> | <b>.000</b> |
| Magnesium (mmol) | <b>0.418</b>  | <b>.000</b> | <b>0.407</b>  | <b>.000</b> |
| Albumin (mg/dl)  | 0.024         | .650        | 0.005         | .927        |
| FE zinc (%)      |               |             | -0.083        | .122        |

  

| CPP2 radius (nm) | Model 1       |             | Model 2       |             |
|------------------|---------------|-------------|---------------|-------------|
|                  | beta          | p           | beta          | p           |
| Age (yrs)        | <b>0.291</b>  | <b>.000</b> | <b>0.286</b>  | <b>.000</b> |
| Sex (m1/f0)      | 0.016         | .797        | 0.003         | .955        |
| Calcium (mmol)   | <b>-0.185</b> | <b>.011</b> | <b>-0.195</b> | <b>.008</b> |
| Phosphate (mmol) | <b>0.157</b>  | <b>.027</b> | 0.119         | .138        |
| Magnesium (mmol) | <b>0.139</b>  | <b>.029</b> | <b>0.149</b>  | <b>.021</b> |
| Albumin (mg/dl)  | -0.015        | .833        | 0.002         | .984        |
| FE zinc (%)      |               |             | 0.075         | .321        |

**Suppl. Table 2.** Factors associated with pulse pressure (n=210), pulse wave velocity (n=202), TACI (n=195) and aortic augmentation index HR 75 (n=142) in blood donors and patients with renal disease in hierarchical regression models (dependent variables: pulse pressure, PWV, TACI or AIX, model 1 includes age, sex, calcium, phosphate, magnesium and albumin, model 2 further includes fractional excretion of zinc), shown with regression coefficients (beta) and levels of significance (p value, bolded if  $p < 0.05$ ).

| Pulse pressure (mmHg) | Model 1      |             | Model 2       |             |
|-----------------------|--------------|-------------|---------------|-------------|
|                       | beta         | p           | beta          | p           |
| Age (yrs)             | <b>0.411</b> | <b>.000</b> | <b>0.416</b>  | <b>.000</b> |
| Sex (m1/f0)           | -0.087       | .158        | -0.076        | .229        |
| Calcium (mmol)        | -0.057       | .439        | -0.048        | .520        |
| Phosphate (mmol)      | 0.085        | .234        | 0.119         | .132        |
| Magnesium (mmol)      | 0.073        | .248        | 0.065         | .306        |
| Albumin (mg/dl)       | -0.135       | .067        | <b>-0.153</b> | <b>.044</b> |
| FE zinc (%)           |              |             | -0.074        | .318        |

  

| PWV (m/s)        | Model 1       |             | Model 2       |             |
|------------------|---------------|-------------|---------------|-------------|
|                  | beta          | p           | beta          | p           |
| Age (yrs)        | <b>0.564</b>  | <b>.000</b> | <b>0.556</b>  | <b>.000</b> |
| Sex (m1/f0)      | <b>0.195</b>  | <b>.001</b> | <b>0.180</b>  | <b>.002</b> |
| Calcium (mmol)   | 0.073         | .271        | 0.056         | .399        |
| Phosphate (mmol) | <b>0.185</b>  | <b>.005</b> | 0.136         | .059        |
| Magnesium (mmol) | <b>-0.164</b> | <b>.005</b> | <b>-0.151</b> | <b>.011</b> |
| Albumin (mg/dl)  | -0.039        | .566        | -0.007        | .922        |
| FE zinc (%)      |               |             | 0.109         | .106        |

  

| TACI (ml/m <sup>2</sup> /mmHg) | Model 1       |             | Model 2       |             |
|--------------------------------|---------------|-------------|---------------|-------------|
|                                | beta          | p           | beta          | p           |
| Age (yrs)                      | <b>-0.580</b> | <b>.000</b> | <b>-0.571</b> | <b>.000</b> |
| Sex (m1/f0)                    | -0.019        | .741        | 0.004         | .948        |
| Calcium (mmol)                 | -0.031        | .651        | -0.014        | .837        |
| Phosphate (mmol)               | <b>-0.208</b> | <b>.002</b> | <b>-0.148</b> | <b>.045</b> |
| Magnesium (mmol)               | 0.022         | .715        | 0.009         | .876        |
| Albumin (mg/dl)                | 0.022         | .761        | -0.021        | .778        |
| FE zinc (%)                    |               |             | <b>-0.140</b> | <b>.045</b> |

  

| Aortic AIX HR75 (%) | Model 1       |             | Model 2       |             |
|---------------------|---------------|-------------|---------------|-------------|
|                     | beta          | p           | beta          | p           |
| Age (yrs)           | 0.162         | .054        | 0.159         | .059        |
| Sex (m1/f0)         | <b>-0.294</b> | <b>.000</b> | <b>-0.308</b> | <b>.000</b> |
| Calcium (mmol)      | -0.112        | .247        | -0.125        | .203        |
| Phosphate (mmol)    | 0.046         | .640        | 0.012         | .915        |
| Magnesium (mmol)    | -0.042        | .643        | -0.037        | .686        |
| Albumin (mg/dl)     | 0.036         | .712        | 0.062         | .547        |
| FE zinc (%)         |               |             | 0.077         | .449        |
